# Supplementary material for: m6A‐Related Angiogenic Genes to Construct Prognostic Signature, Reveal Immune and Oxidative Stress Landscape, and Screen Drugs in Hepatocellular Carcinoma
Source: Hindawi journal article supplement (doi:10.1155/2022/8301888), 2022-01-01

**A**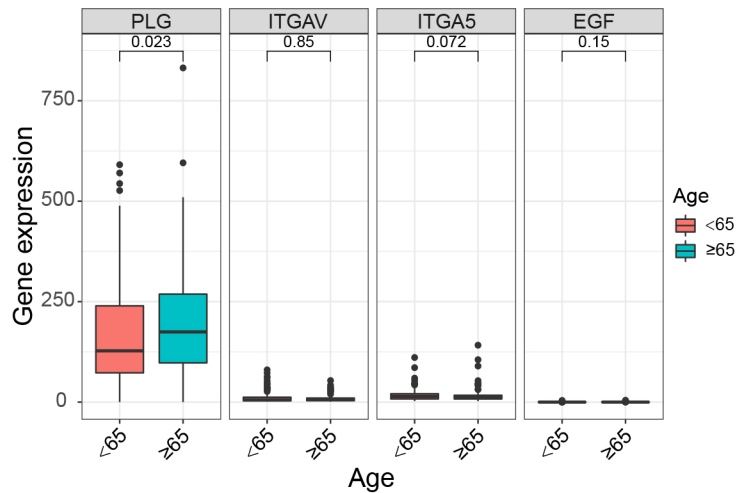**B**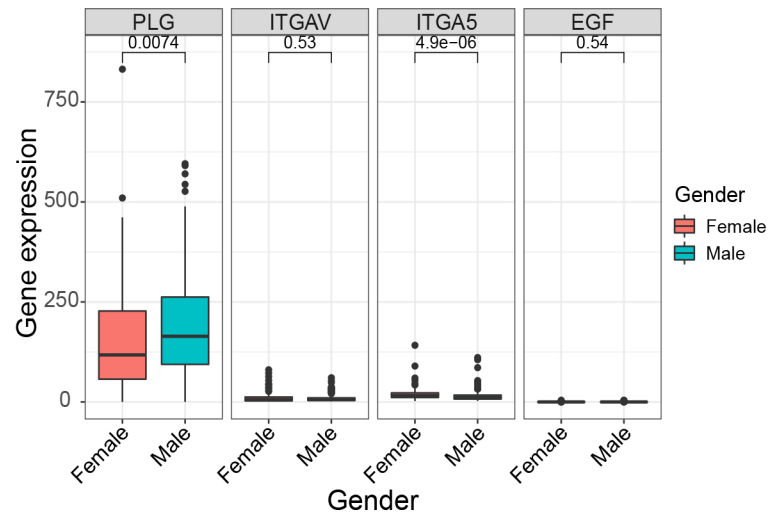**C**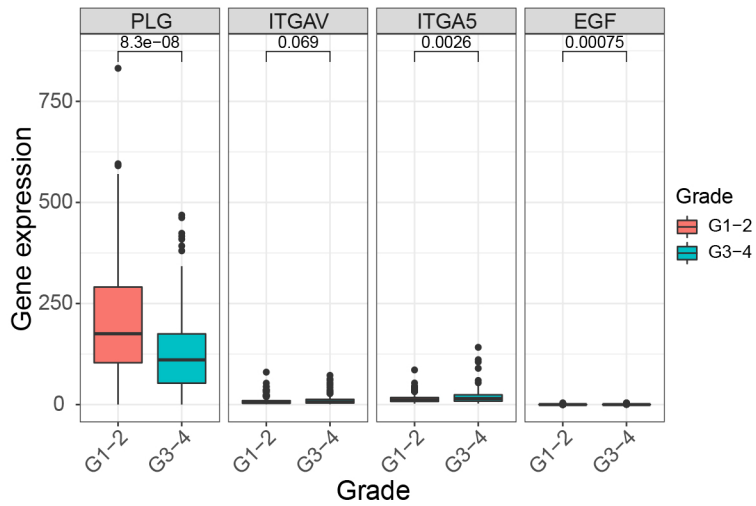**D**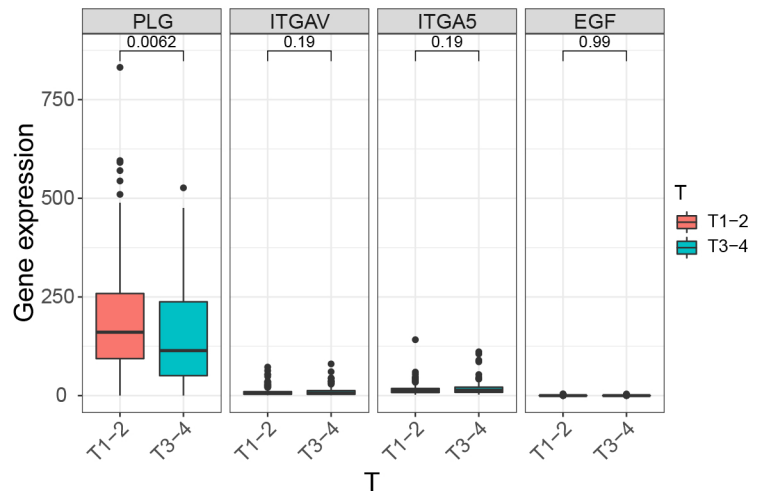

Supplement: f4 [file 8301888.f4.pdf]
